# Supplementary material
Source: PubMed Central journal article supplement (PMC3164930)
Supplement: NIHMS313199-supplement-ONLINE_SUPPLEMENTAL_FIGURES.pdf [file NIHMS313199-supplement-ONLINE_SUPPLEMENTAL_FIGURES.pdf]

## ONLINE SUPPLEMENTAL FIGURES

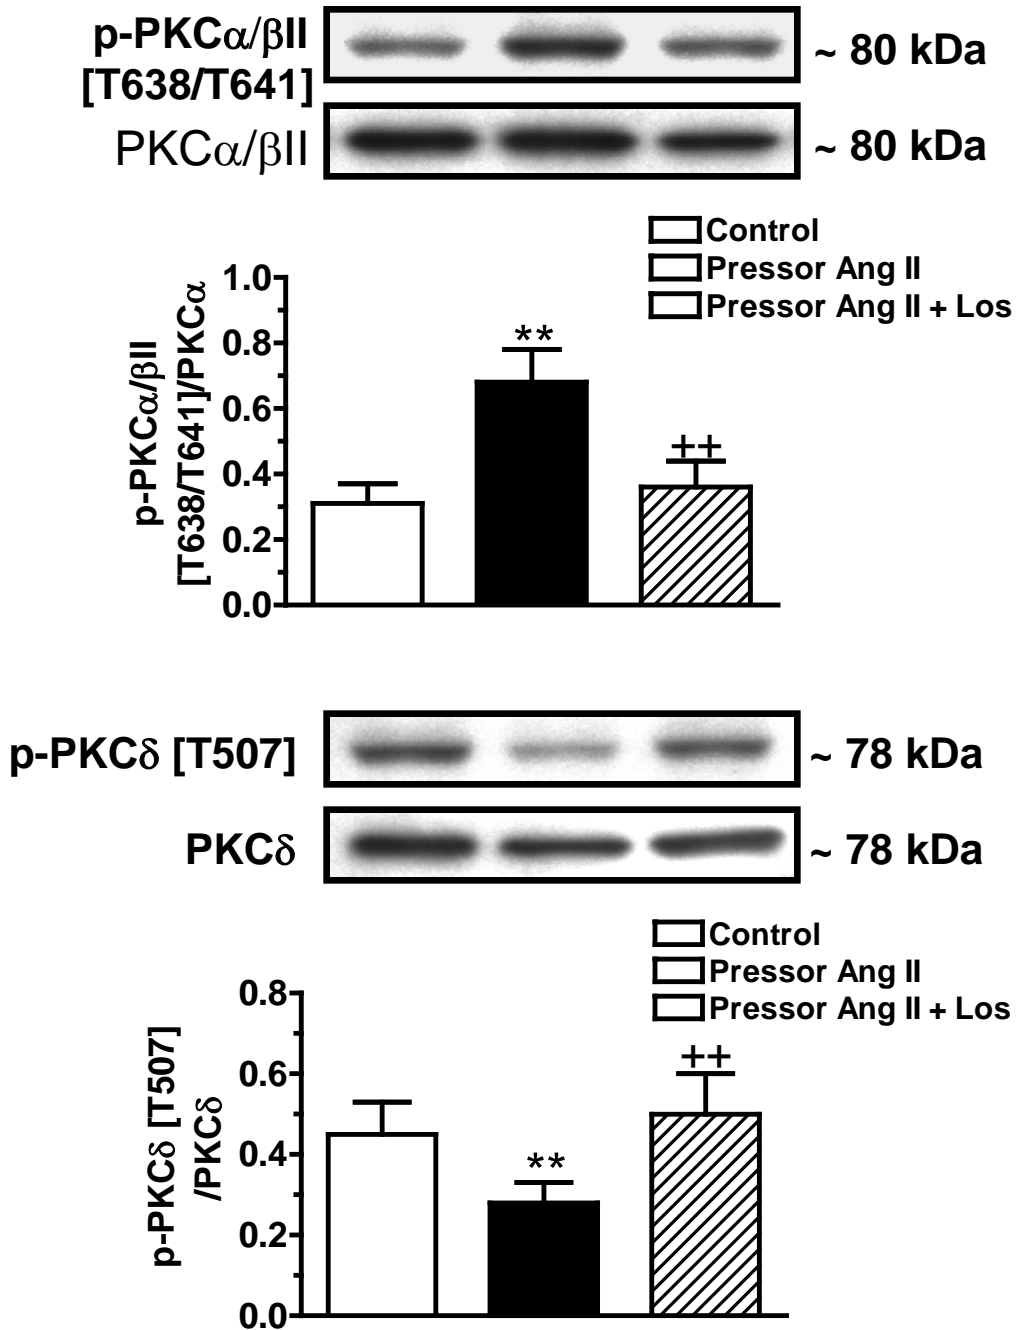

**Figure S1.** Effects of the pressor dose of Ang II infusion and concurrent losartan treatment for 2 weeks on phospho-PKC $\alpha/\beta$ II [T638/T641] and phospho-PKC $\delta$  [T507] signaling proteins in freshly isolated proximal tubules of the rat kidney. \*\* $p < 0.01$  vs. control; ++  $p < 0.01$  vs. Ang II-infused rats.

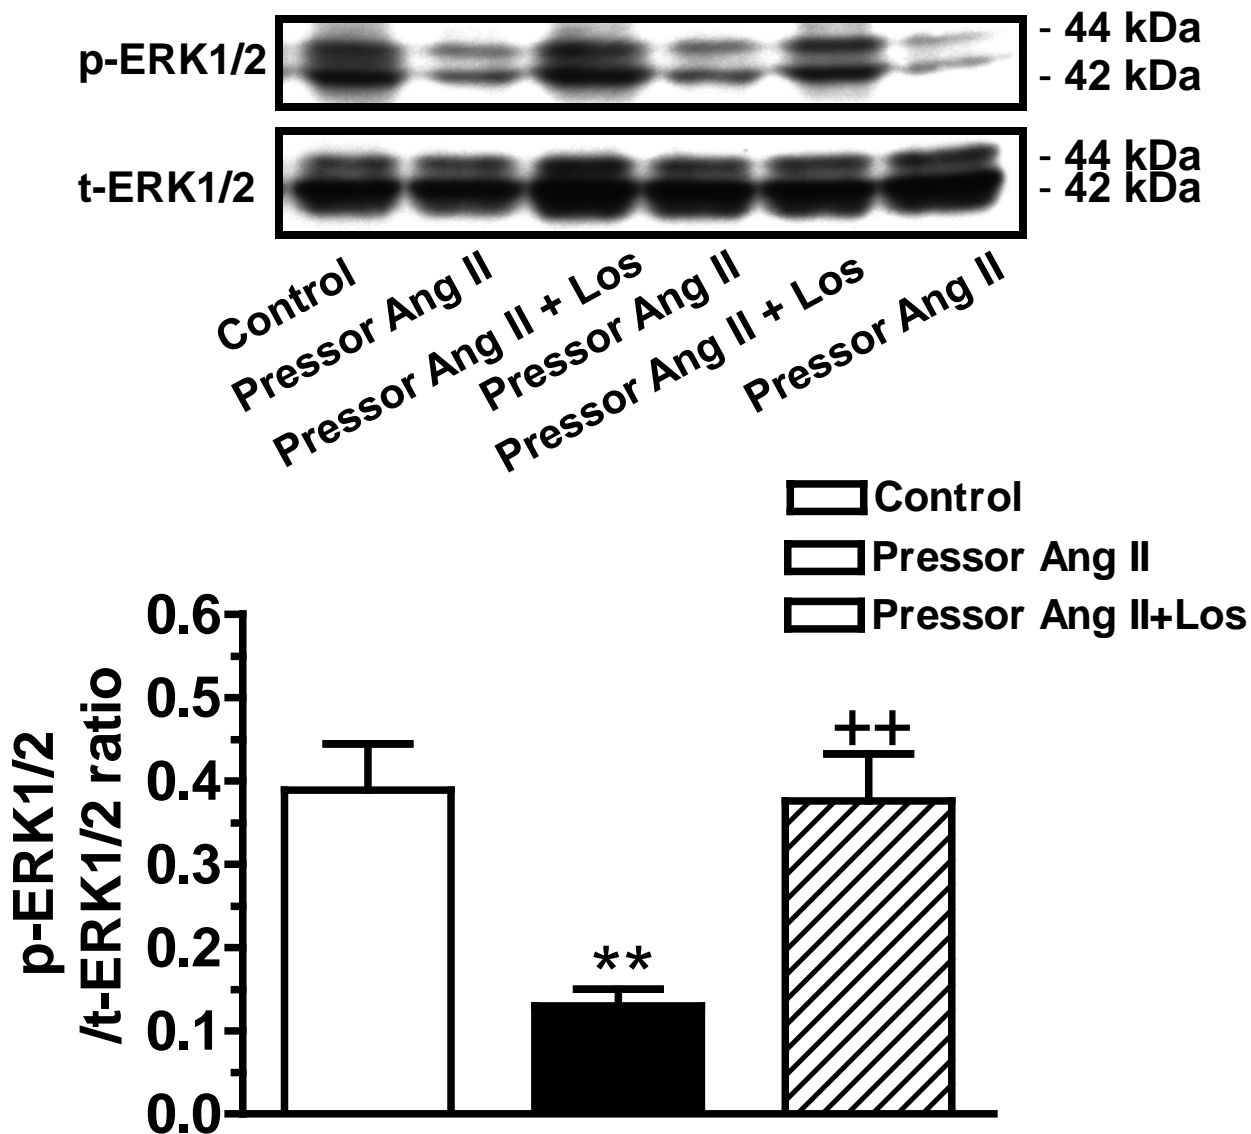

**Figure S2.** Effects of the pressor dose of Ang II infusion and concurrent losartan treatment for 2 weeks on phospho-ERK1/2 signaling proteins in freshly isolated proximal tubules of the rat kidney. \*\* $p < 0.01$  vs. control; ++  $p < 0.01$  vs. Ang II-infused rats.

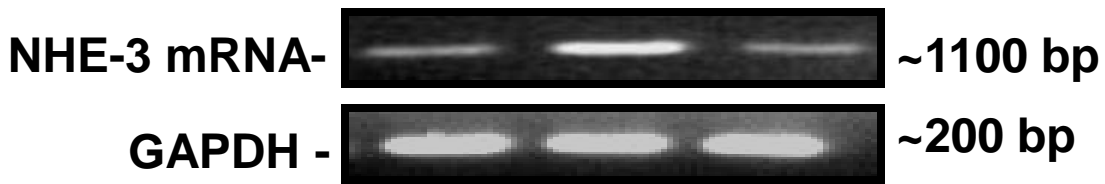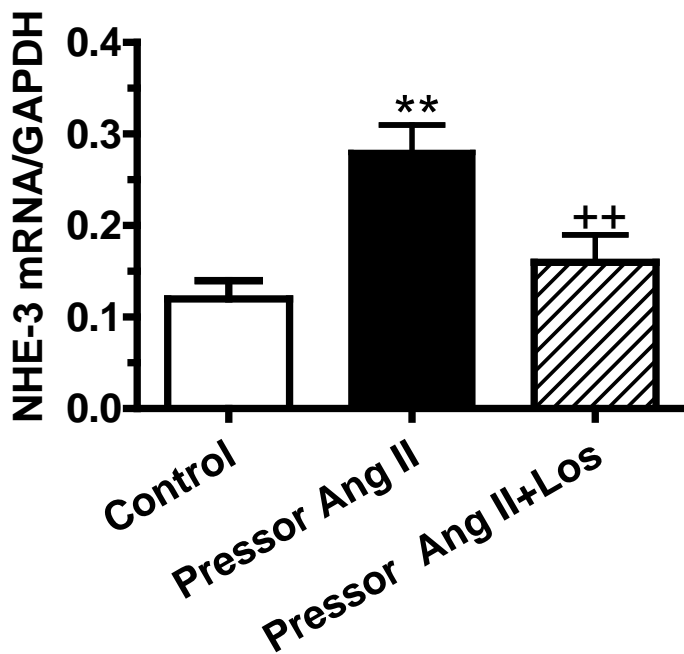

**Figure S3.** Effects of the pressor dose of Ang II infusion and concurrent losartan treatment for 2 weeks on NHE-3 mRNA expression in freshly isolated proximal tubules of the rat kidney. \*\* $p < 0.01$  vs. control; ++ $p < 0.01$  vs. Ang II-infused rats.

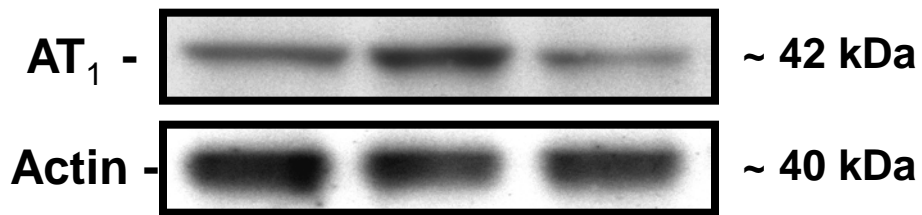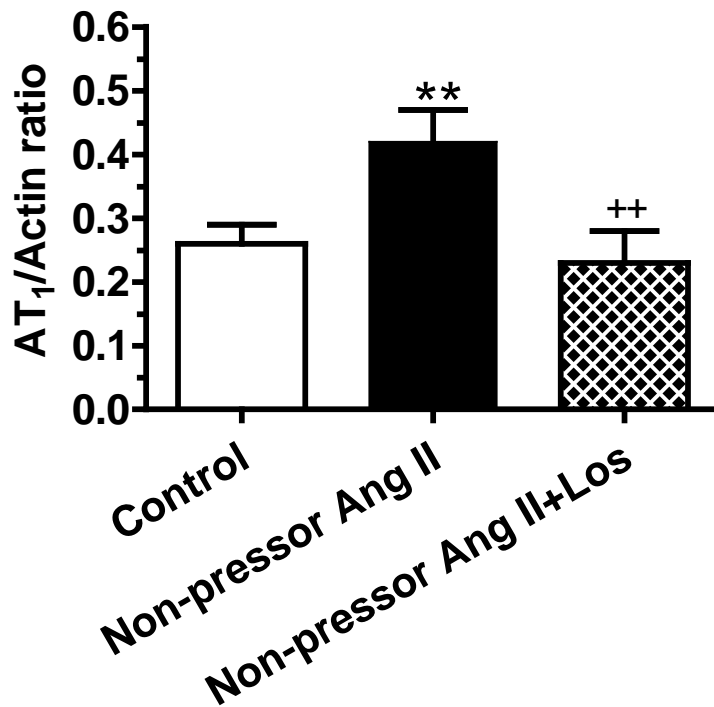

**Figure S4.** Effects of the non-pressor dose of Ang II infusion and concurrent losartan treatment for 2 weeks on AT<sub>1</sub> receptor proteins in membrane fractions of freshly isolated proximal tubules of the rat kidney. \*\* $p < 0.01$  vs. control; ++ $p < 0.01$  vs. Ang II-infused rats.

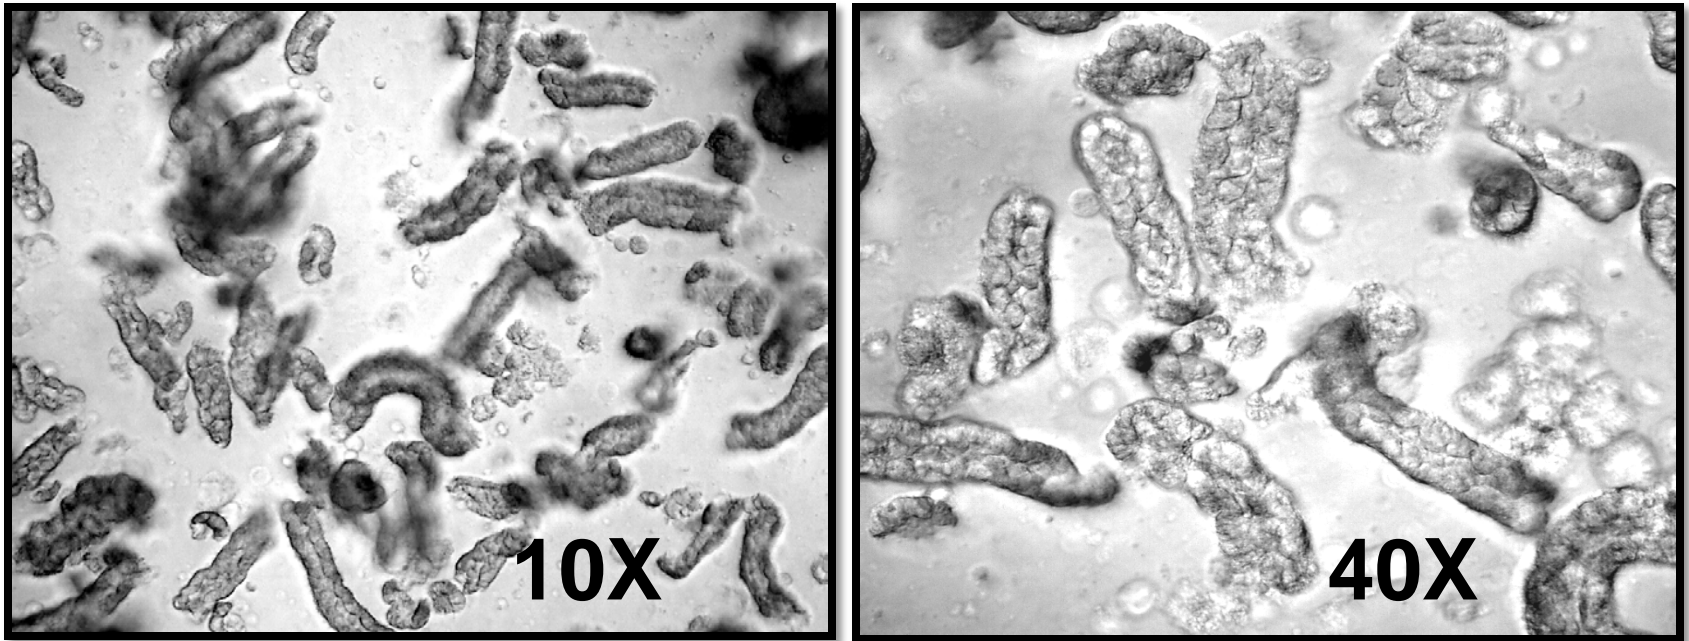

**Figure S5.** Representative phase-contrast micrographs of freshly isolated proximal tubules from the outer cortex of the rat kidney.

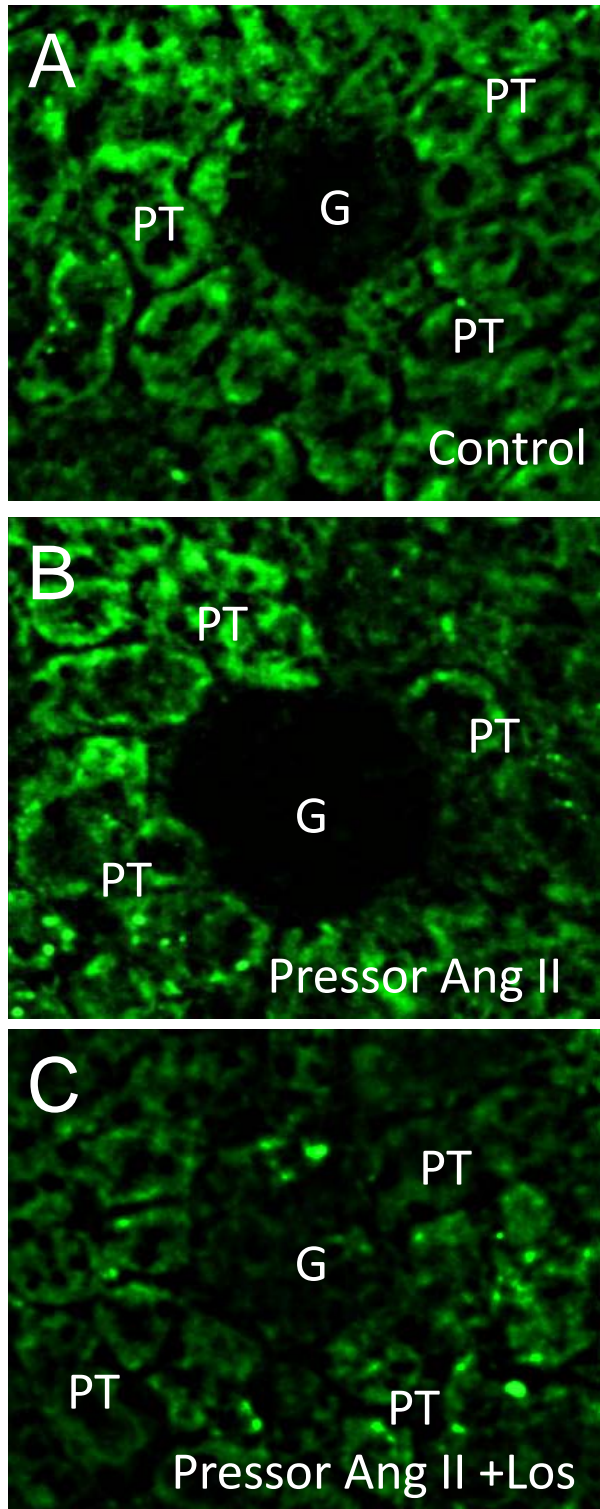

**Figure S6.** Effect of the pressor dose of Ang II infusion for 2 weeks on phosphorylated c-Jun [S73] immunofluorescence staining in Ang II-infused rats.

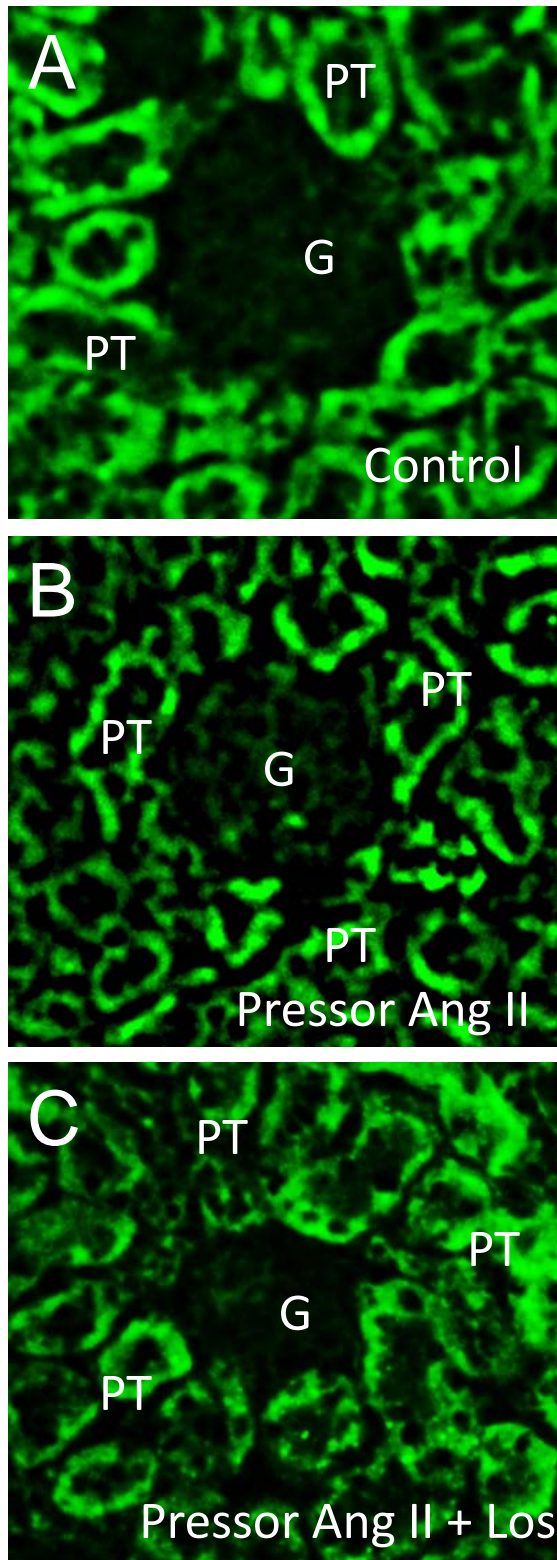

**Figure S7.** Effect of the pressor dose of Ang II infusion for 2 weeks on phosphorylated Src [Y418] immunofluorescence staining in Ang II-infused rats.

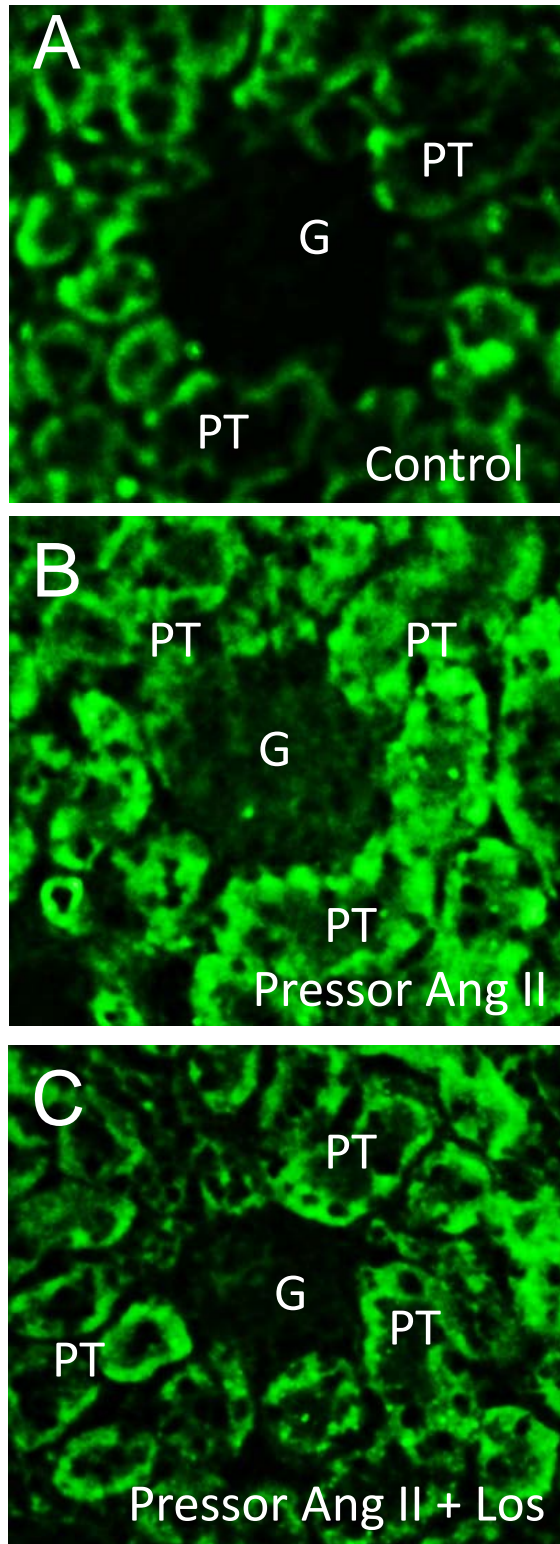

**Figure S8.** Effect of the pressor dose of Ang II infusion for 2 weeks on phosphorylated Src [Y529] immunofluorescence staining in Ang II-infused rats.



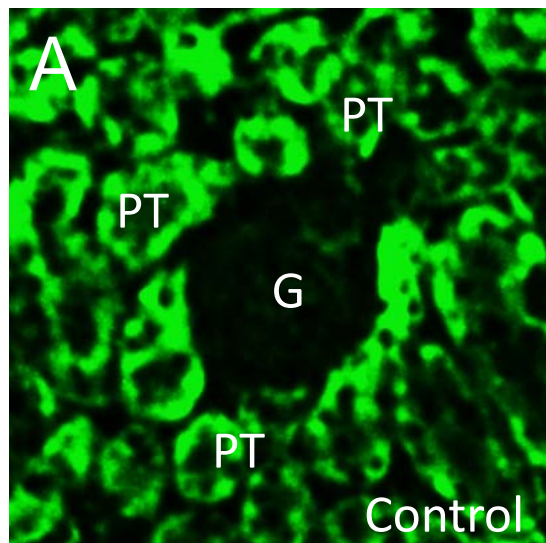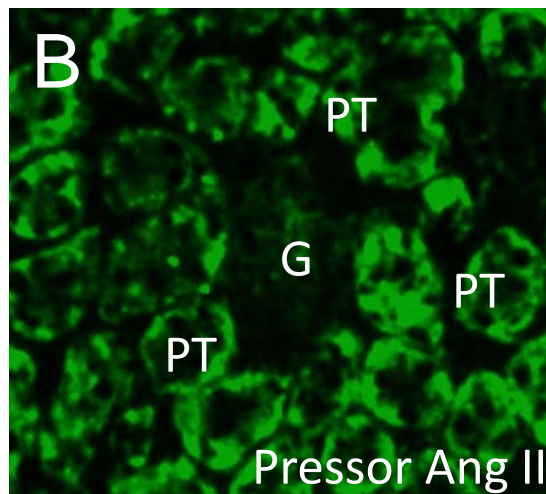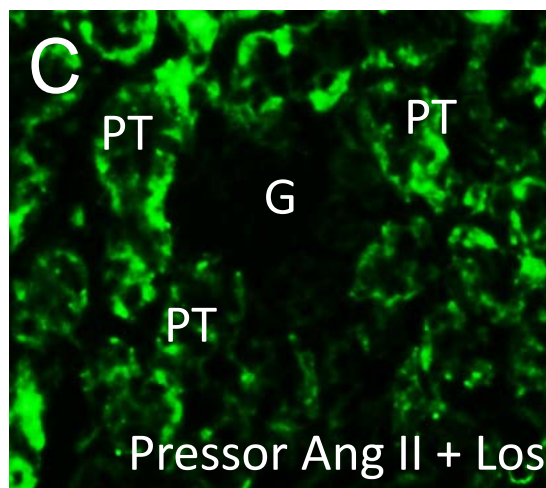

**Figure S9.** Effect of the pressor dose of Ang II infusion for 2 weeks on phosphorylated Rb [807+S811] immunofluorescence staining in Ang II-infused rats.

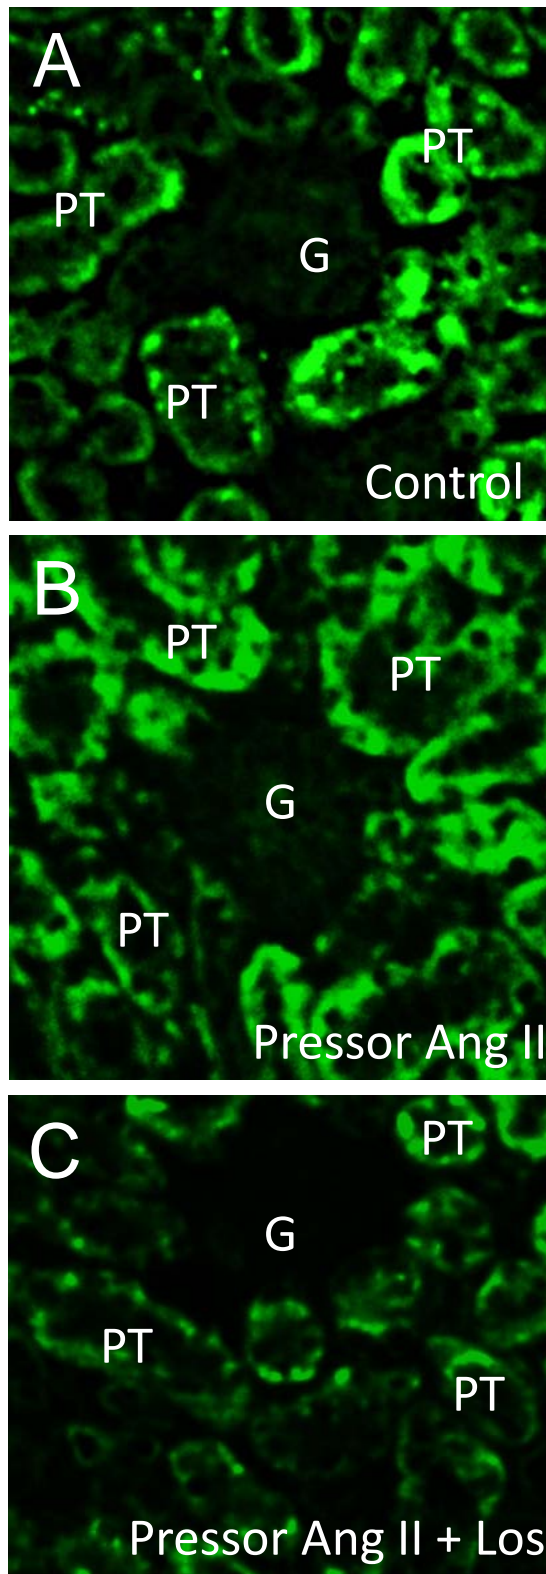

**Figure S10.** Effect of the pressor dose of Ang II infusion for 2 weeks on phosphorylated STAT-3 [S727] immunofluorescence staining in Ang II-infused rats.
